# Supplementary material for: Direct dioxygen evolution in collisions of carbon dioxide with surfaces
Source: Nat Commun. 2019 May 24;10:2294. doi: 10.1038/s41467-019-10342-6 (PMC6534623; doi:10.1038/s41467-019-10342-6)
Supplement: Supplementary file 1 — Supplementary Information [file 41467_2019_10342_MOESM1_ESM.docx]

Supplementary Figures

for

**Direct dioxygen evolution in collisions of carbon dioxide with surfaces**

Yunxi Yao, Philip Shushkov, Thomas F. Miller III, and Konstantinos P. Giapis

Division of Chemistry and Chemical Engineering, California Institute of Technology, Pasadena, California 91125, USA

*Email:[giapis@cheme.caltech.edu](mailto:giapis@cheme.caltech.edu)


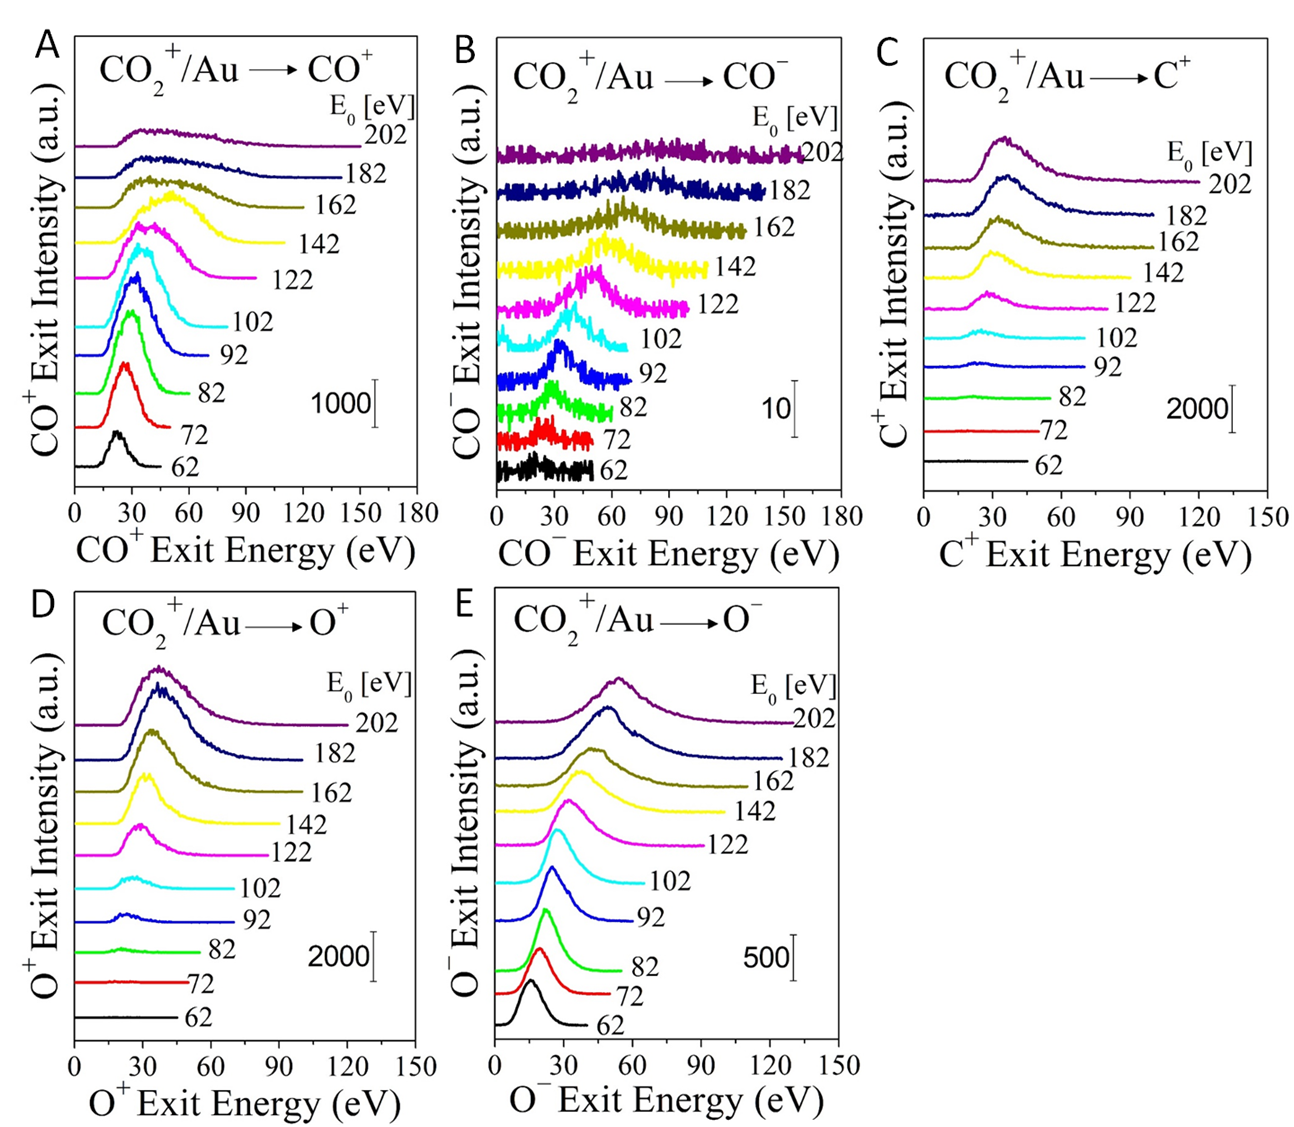
Supplementary Figure 1. **Fragmentation products in CO2+ collisions with Au surfaces**. Product energy distributions of(A) CO+, (B) O+, (C) C+, (D) O+, and (E) O− ion exits from CO2+/Au for various CO2+ incidence energies (E0) as annotated on each panel.Signal intensities between corresponding positive and negative ion exits cannot be compared due to differences in detector bias.

Supplementary Figure 2. **Comparison of experimental vs. calculated O2¯ formation selectivity as a function of CO2+ incidence energy.** The selectivity is computed as the ratio I(O2¯)/[I(O2¯)+I(O¯)]. The error bars represent one standard deviation across 10 samples of 2000 trajectories each from the ensemble of molecular dynamics trajectories.

Supplementary Figure 3. **Calculated exit velocity distributions of scattering products from CO2 collisions with Au surfaces at 56.4 eV incidence energy.** Full lines depict the exit velocity distributions of the ions and dashed lines depict those of the parent neutral products. “Partial” refers to O atoms produced via partial dissociation of CO2, and “full” refers to O atoms produced via full dissociation. The overlap of the O– distributions formed via partial and full dissociation determines the wide breath of the summed O– distribution. The shifts in the relative positions of the neutral scattering products result from the energy requirements of the different dissociation channels, whereas the shifts between the distributions of the ions and their parent neutrals result from the energy needed for ionization and the exponential dependence of the ionization probability on the inverse of the normal velocity component with respect to the surface.

Supplementary Figure 4. **Collision-induced non-adiabatic transitions in CO2 scattering on Au surfaces.** (A) Electronic energy of the ground (blue) and lowest few excited states of A’ (full lines) and A” (dashed lines) symmetry of a CO2 molecule along a representative scattering trajectory. As the CO2 collides with the surface, the molecule bends and reaches a conical intersection (CI) region, where the ground and first A’ excited state become close in energy. (B) Averaging over an ensemble of 2000 trajectories of initially ro-vibrationally hot CO2 molecules shows that nearly 70% of the scattering trajectories reach the CI region (red). From the trajectories that have reached the CI region about 40% undergo a non-adiabatic transition to the first excited state (blue), which brings the total collision-induced non-adiabatic flux to 28%.


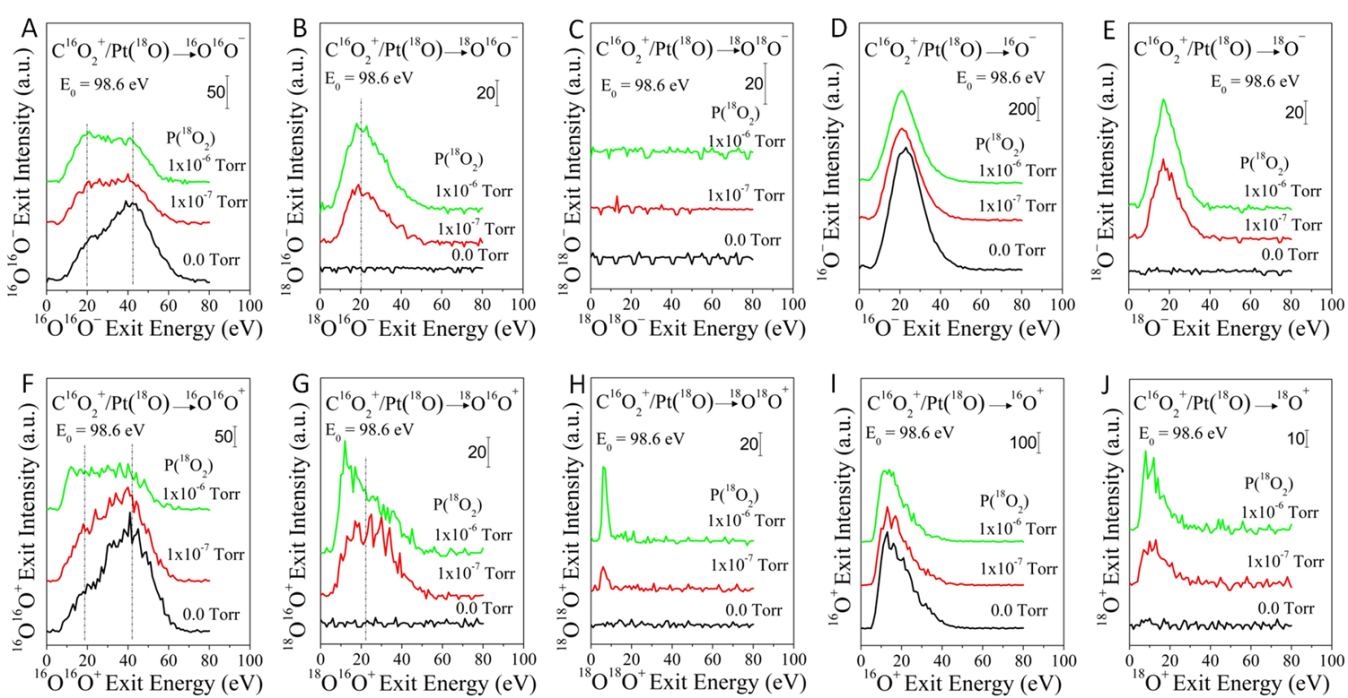


Supplementary Figure 5. **CO2+ collisions with 18O-atom covered Pt surfaces as a function of coverage.** Product energy distributions of(A) 16O16O−, (B) 18O16O−, (C) 18O18O−, (D) 16O−, (E) 18O− ,(F) 16O16O+, (G) 18O16O+, (H) 18O18O+,(I) 16O− , and (J) 18O+ ion exits from CO2+/Pt(18O) for CO2+ with an incidence energy of E0=98.6 eV at various 18O2 exposure pressures as annotated on each panel.When the Pt surface is covered with 18O, an Eley-Rideal reaction product 18O16O can be formed between surface 18O and 16O from within the incident CO2+. The 18O16O product is indeed observed in both charge polarities but it exits at low energy (~20 eV) as expected. In contrast, the 16O16O product of the intramolecular reaction exits at high energy (~42 eV) in both charge polarities.


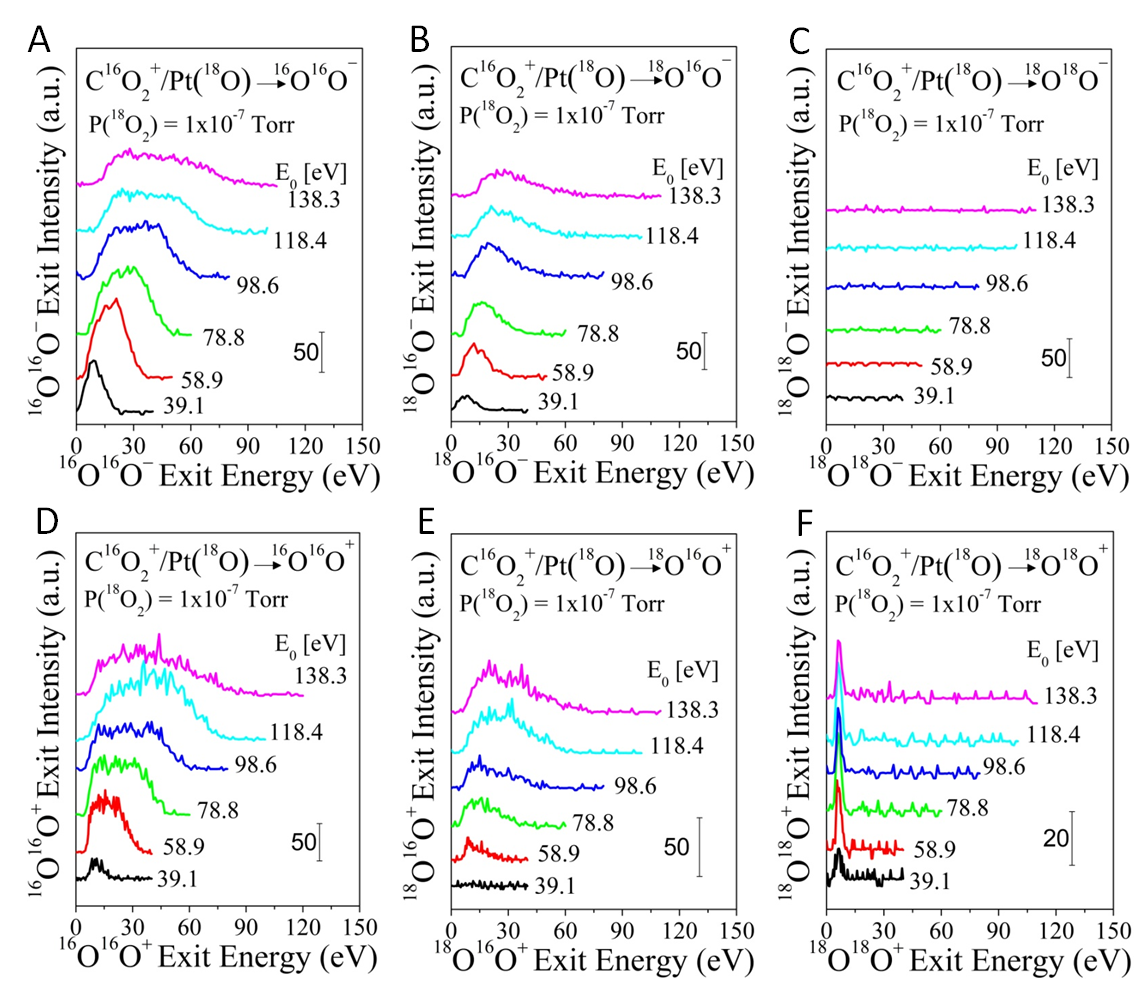


Supplementary Figure S6. **CO2+ collisions with 18O-atom covered Pt surfaces as a function of incidence energy.** Product energy distributions of(A) 16O16O−, (B) 18O16O−, (C) 18O18O−, (D) 16O16O+, (E) 18O16O+, and (F) 18O18O+ ion exits from CO2+/Pt(18O) at various incidence energies as annotated on each panel.When the Pt surface is covered with 18O, the Eley-Rideal reaction product 18O16O, formed between surface 18O-atoms and 16O from within the incident CO2+, exits the surface with low kinetic energy (Panels B & E). In contrast, the energy distributions of the intramolecular reaction product 16O16O are bimodal, extending to higher exit energies (Panels A & D). The high exit energy part of the 16O16O± distributions is inconsistent with an origin in Eley-Rideal reactions or surface sputtering.
